# Supplementary material for: The Peptide Vaccine Combined with Prior Immunization of a Conventional Diphtheria-Tetanus Toxoid Vaccine Induced Amyloid β Binding Antibodies on Cynomolgus Monkeys and Guinea Pigs
Source: J Immunol Res. 2015 Oct 11;2015:786501. doi: 10.1155/2015/786501 (PMC4619934; doi:10.1155/2015/786501)
Supplement: Supplementary file 1 — (1) Aβ peptide vaccination in Tg2576 mice. (2) Step-down passive avoidance test of Tg2576 mice. [file 786501.f1.zip]

Archive with 2 entries (2 files):
- description.docx
- NewSupplimentalFile150802.docx
